# Supplementary material
Source: PubMed Central journal article supplement (PMC3800215)
Supplement: NIHMS478478-supplement-supplement_1.pdf [file NIHMS478478-supplement-supplement_1.pdf]

**Appendix Table 1. Chronic conditions of Medicare beneficiaries assigned to different types of provider groups, adjusted for county of residence.**

|                                                       | Provider Group Type                                   |                                                          |                                            |                                         |
|-------------------------------------------------------|-------------------------------------------------------|----------------------------------------------------------|--------------------------------------------|-----------------------------------------|
|                                                       | Small groups<br>(reference category)<br>(N=1,924,001) | Groups sufficiently large to participate in ACO programs |                                            |                                         |
|                                                       |                                                       | Medium-sized<br>independent groups<br>(N=678,004)        | Large independent<br>groups<br>(N=524,950) | Hospital-based<br>groups<br>(N=785,795) |
| <b>Conditions from Chronic Condition Warehouse, %</b> |                                                       |                                                          |                                            |                                         |
| Diabetes                                              | 31.4                                                  | 30.4                                                     | 29.9                                       | 30.2                                    |
| Ischemic heart disease                                | 46.8                                                  | 44.7                                                     | 43.4                                       | 45.0                                    |
| H/o myocardial infarction                             | 5.2                                                   | 5.0                                                      | 4.8                                        | 5.1                                     |
| Congestive heart failure                              | 25.5                                                  | 23.9                                                     | 23.2                                       | 24.8                                    |
| Atrial fibrillation                                   | 13.0                                                  | 12.7                                                     | 12.2                                       | 12.5                                    |
| Chronic kidney disease                                | 15.7                                                  | 15.1                                                     | 15.2                                       | 16.4                                    |
| H/o stroke or TIA                                     | 12.3                                                  | 12.1                                                     | 12.0                                       | 12.0                                    |
| COPD                                                  | 22.1                                                  | 20.9                                                     | 20.3                                       | 20.9                                    |
| Depression                                            | 26.6                                                  | 27.2                                                     | 27.5                                       | 28.2                                    |
| OA or RA                                              | 41.3                                                  | 40.3                                                     | 39.6                                       | 39.1                                    |
| Osteoporosis                                          | 29.4                                                  | 29.6                                                     | 28.7                                       | 28.6                                    |
| H/o hip fracture                                      | 2.6                                                   | 2.6                                                      | 2.5                                        | 2.5                                     |
| Dementia                                              | 7.6                                                   | 7.7                                                      | 7.6                                        | 7.6                                     |
| Alzheimer's disease                                   | 2.7                                                   | 2.9                                                      | 2.8                                        | 2.8                                     |
| Breast cancer                                         | 3.9                                                   | 4.1                                                      | 4.1                                        | 4.8                                     |
| Colorectal cancer                                     | 2.3                                                   | 2.1                                                      | 2.2                                        | 2.4                                     |
| Prostate cancer                                       | 4.9                                                   | 4.5                                                      | 4.5                                        | 4.8                                     |
| Lung cancer                                           | 1.1                                                   | 1.1                                                      | 1.0                                        | 1.4                                     |
| Endometrial cancer                                    | 0.5                                                   | 0.5                                                      | 0.5                                        | 0.6                                     |
| Glaucoma                                              | 31.4                                                  | 30.4                                                     | 29.9                                       | 30.2                                    |
| Cataracts                                             | 46.8                                                  | 44.7                                                     | 43.4                                       | 45.0                                    |

TIA = transient ischemic attack; COPD = chronic obstructive pulmonary disease; OA = osteoarthritis; RA = rheumatoid arthritis.

Appendix Table 2. Differences in spending and quality of care between larger and smaller groups, by HMO penetration

| Annual spending or quality metric                                          | Mean difference for ACO-eligible groups vs. reference category of small groups |                  |                  |                                    |                   |                  |                       |                 |                 |
|----------------------------------------------------------------------------|--------------------------------------------------------------------------------|------------------|------------------|------------------------------------|-------------------|------------------|-----------------------|-----------------|-----------------|
|                                                                            | Medium-sized independent physician groups                                      |                  |                  | Large independent physician groups |                   |                  | Hospital-based groups |                 |                 |
|                                                                            | HMO Penetration                                                                |                  |                  | HMO Penetration                    |                   |                  | HMO Penetration       |                 |                 |
|                                                                            | <25%                                                                           | 25-49%           | ≥50%             | <25%                               | 25-49%            | ≥50%             | <25%                  | 25-49%          | ≥50%            |
| <b>Total per-beneficiary medical spending, \$</b>                          | 37 <sup>§</sup>                                                                | -107             | -421             | 181                                | -150              | -433             | 741                   | 881             | 1,042           |
| <b>Spending by type of claim, \$</b>                                       |                                                                                |                  |                  |                                    |                   |                  |                       |                 |                 |
| Hospital facility                                                          | 71                                                                             | -12 <sup>§</sup> | -89 <sup>§</sup> | 131                                | -26 <sup>§</sup>  | -96 <sup>§</sup> | 346                   | 505             | 615             |
| Physician/supplier services                                                | -58                                                                            | -108             | -242             | -104                               | -196              | -288             | 103                   | -82             | -260            |
| Hospital outpatient department                                             | 43                                                                             | 12 <sup>§</sup>  | 6 <sup>§</sup>   | 76                                 | 68                | -59              | 234                   | 395             | 576             |
| <b>Spending on physician and ancillary services by BETOS category, \$*</b> |                                                                                |                  |                  |                                    |                   |                  |                       |                 |                 |
| Office visits                                                              | 4 <sup>§</sup>                                                                 | 0 <sup>§</sup>   | -8 <sup>§</sup>  | 8                                  | 5 <sup>§</sup>    | -32              | 22                    | 41              | 83              |
| Specialty consultations                                                    | 4 <sup>§</sup>                                                                 | -7               | -17              | 1 <sup>§</sup>                     | 1 <sup>§</sup>    | -22              | 5 <sup>§</sup>        | -5 <sup>§</sup> | 6 <sup>§</sup>  |
| Major procedures <sup>†</sup>                                              | -14 <sup>§</sup>                                                               | -26              | -59              | -19 <sup>§</sup>                   | -20 <sup>§</sup>  | -64              | -6 <sup>§</sup>       | 20 <sup>§</sup> | 27 <sup>§</sup> |
| Minor and ambulatory procedures, endoscopy                                 | -44                                                                            | -22              | -69              | -5 <sup>§</sup>                    | -12 <sup>§</sup>  | -87              | 14 <sup>§</sup>       | -3 <sup>§</sup> | 0 <sup>§</sup>  |
| Imaging                                                                    | -5 <sup>§</sup>                                                                | -15              | -39              | -3 <sup>§</sup>                    | -13               | -67              | 40                    | 31              | 36              |
| Cardiac interventions and tests                                            | -1 <sup>§</sup>                                                                | -9               | -19              | -2 <sup>§</sup>                    | -12               | -19              | 8                     | -1 <sup>§</sup> | 9 <sup>§</sup>  |
| Radiation therapy, chemotherapy and other Part B-covered drugs             | 10 <sup>§</sup>                                                                | 24 <sup>§</sup>  | -60 <sup>§</sup> | 3 <sup>§</sup>                     | -27 <sup>§</sup>  | -52 <sup>§</sup> | 244                   | 238             | 229             |
| Lab tests                                                                  | 0 <sup>§</sup>                                                                 | 0 <sup>§</sup>   | -9 <sup>§</sup>  | 8                                  | 2 <sup>§</sup>    | -29              | 41                    | 29              | 22              |
| <b>Quality of Care, %<sup>¶</sup></b>                                      |                                                                                |                  |                  |                                    |                   |                  |                       |                 |                 |
| 30-day readmission                                                         | 0.4                                                                            | 0.2 <sup>§</sup> | 0.9              | 0.6                                | -0.1 <sup>§</sup> | 0.4 <sup>§</sup> | 1.4                   | 1.0             | 2.0             |
| Screening mammography                                                      | 1.9                                                                            | 1.3              | 2.2 <sup>§</sup> | 1.1 <sup>§</sup>                   | 2.4               | 1.5 <sup>§</sup> | 2.8                   | 2.6             | 2.9             |

|                         |     |                   |                   |     |                  |                   |                  |                  |                   |
|-------------------------|-----|-------------------|-------------------|-----|------------------|-------------------|------------------|------------------|-------------------|
| Diabetes                |     |                   |                   |     |                  |                   |                  |                  |                   |
| LDL cholesterol testing | 2.5 | 0.9               | -0.3 <sup>§</sup> | 2.0 | 0.9              | 0.9 <sup>§</sup>  | 0.6 <sup>§</sup> | -0.8             | -1.6              |
| Hemoglobin A1c testing  | 3.0 | 2.0               | 1.0 <sup>§</sup>  | 3.4 | 2.8              | 2.2               | 1.1              | 0.3 <sup>§</sup> | 0.1 <sup>§</sup>  |
| Retinal exam            | 0.7 | 0.8               | 0.5 <sup>§</sup>  | 1.2 | 1.2              | 0.8 <sup>§</sup>  | 0.2 <sup>§</sup> | 0.7              | -0.8 <sup>§</sup> |
| All 3 services          | 2.9 | 1.6               | 0.9 <sup>§</sup>  | 3.3 | 2.6              | 2.7               | 1.4              | 0.6 <sup>§</sup> | -0.6 <sup>§</sup> |
| Cardiovascular disease  |     |                   |                   |     |                  |                   |                  |                  |                   |
| LDL cholesterol testing | 1.8 | -0.2 <sup>§</sup> | 0.7 <sup>§</sup>  | 1.3 | 0.0 <sup>§</sup> | -0.1 <sup>§</sup> | 0.2 <sup>§</sup> | -1.5             | -1.6              |

ACO = accountable care organization; BETOS = Berenson-Eggers Type of Service; LDL = low-density lipoprotein.

\*Includes claims for physician and ancillary (supplier) services appearing in the carrier file as well as claims for physician and ancillary services appearing in the hospital outpatient department claims file. Analyses of spending by BETOS categories were restricted to the 5% sample of Medicare beneficiaries, for whom we had both hospital outpatient department and carrier claims files. BETOS codes were grouped as follows: office visits (M1A-M1B); specialty consultations (M5A-M5D, M6); major procedures (P0, P4A-P4E, P1A-P3D except P2D); minor and ambulatory procedure and endoscopy (P5A-P5E, P6A-P6D, P8A-P8I); imaging (I1A-I1F, I2A-I2D, I3A-I3F); cardiac catheterization, testing, and imaging (I4A-I4B, P2D, T2A-T2D); radiation therapy, chemotherapy, and other drugs (P7A-P7B, O1D-O1E); lab tests (T1A-T1H).

†Includes spending for anesthesia services.

¶Analyses of quality measures were restricted to the 5% sample of Medicare beneficiaries, for whom we had hospital outpatient department, inpatient facility, and carrier claims to assess receipt of key services. Readmissions were assessed among beneficiaries with at least one acute care hospitalization in 2009. We counted only one readmission per beneficiary annually in calculating 30-day readmission rates. Screening mammography was assessed among women ages 65-69 years. Diabetes services were assessed among beneficiaries with a history of diabetes prior to 2009. LDL testing for cardiovascular disease was assessed among beneficiaries with ischemic heart disease, history of myocardial infarction, or history of stroke or TIA present prior to 2009.

§Denotes lack of statistically significant difference relative to reference category of small groups. All other estimates for ACO-eligible group types differ significantly from small groups at least at the P<0.05 level.

**Appendix Table 3. Differences in spending and quality of care between ACO-eligible and ACO-ineligible groups, by primary care orientation**

| Annual spending or quality metric                                          | Mean difference for ACO-eligible groups vs. reference category of small groups |                  |                                     |                  |                                     |                 |
|----------------------------------------------------------------------------|--------------------------------------------------------------------------------|------------------|-------------------------------------|------------------|-------------------------------------|-----------------|
|                                                                            | Medium-sized independent physician groups                                      |                  | Large independent physician groups  |                  | Hospital-based groups               |                 |
|                                                                            | Primary care fraction of physicians                                            |                  | Primary care fraction of physicians |                  | Primary care fraction of physicians |                 |
|                                                                            | <35%                                                                           | ≥35%             | <35%                                | ≥35%             | <35%                                | ≥35%            |
| <b>Total per-beneficiary medical spending, \$</b>                          | 795                                                                            | -293             | 317                                 | -176             | 1,741                               | 29 <sup>§</sup> |
| <b>Spending by type of claim, \$</b>                                       |                                                                                |                  |                                     |                  |                                     |                 |
| Hospital facility                                                          | 374                                                                            | -70              | 148                                 | -12 <sup>§</sup> | 838                                 | 102             |
| Physician services                                                         | 149                                                                            | -163             | -52                                 | -206             | 151                                 | -196            |
| Hospital outpatient department                                             | 260                                                                            | -32              | 117                                 | 24               | 594                                 | 135             |
| <b>Spending on physician and ancillary services by BETOS category, \$*</b> |                                                                                |                  |                                     |                  |                                     |                 |
| Office visits                                                              | 11                                                                             | -2 <sup>§</sup>  | 33                                  | -9               | 76                                  | 7               |
| Specialty consultations                                                    | -5 <sup>§</sup>                                                                | -3 <sup>§</sup>  | 6 <sup>§</sup>                      | -5               | 4 <sup>§</sup>                      | -1 <sup>§</sup> |
| Major procedures <sup>†</sup>                                              | 28 <sup>§</sup>                                                                | -36              | 25 <sup>§</sup>                     | -41              | 50                                  | -26             |
| Minor and ambulatory procedures, endoscopy                                 | 31                                                                             | -56              | 52                                  | -40              | 34                                  | -22             |
| Imaging                                                                    | 44                                                                             | -27              | -1 <sup>§</sup>                     | -23              | 88                                  | -11             |
| Cardiac interventions and tests                                            | 3 <sup>§</sup>                                                                 | -9               | 4 <sup>§</sup>                      | -12              | 16                                  | -5              |
| Radiation therapy, chemotherapy and other Part B-covered drugs             | 207                                                                            | -45              | 42 <sup>§</sup>                     | -42              | 454                                 | 42              |
| Lab tests                                                                  | 39                                                                             | -12              | 13                                  | -5 <sup>§</sup>  | 70                                  | -1 <sup>§</sup> |
| <b>Quality of Care, %<sup>¶</sup></b>                                      |                                                                                |                  |                                     |                  |                                     |                 |
| 30-day readmission                                                         | 1.2                                                                            | 0.1 <sup>§</sup> | 0.4 <sup>§</sup>                    | 0.2 <sup>§</sup> | 2.1                                 | 0.6             |

|                         |                  |     |                  |     |                  |                  |
|-------------------------|------------------|-----|------------------|-----|------------------|------------------|
| Screening mammography   | 0.6 <sup>§</sup> | 2.0 | 0.4 <sup>§</sup> | 2.0 | 2.4              | 3.1              |
| Diabetes                |                  |     |                  |     |                  |                  |
| LDL cholesterol testing | -1.3             | 2.3 | -1.3             | 2.2 | -2.4             | 1.7              |
| Hemoglobin A1c testing  | -1.2             | 3.3 | 0.5 <sup>§</sup> | 3.8 | -1.3             | 2.6              |
| Retinal exam            | 0.7 <sup>§</sup> | 0.7 | 0.2 <sup>§</sup> | 1.4 | 0.1 <sup>§</sup> | 0.5 <sup>§</sup> |
| All 3 services          | 0.1 <sup>§</sup> | 2.7 | 0.1 <sup>§</sup> | 3.8 | -0.9             | 2.3              |
| Cardiovascular disease  |                  |     |                  |     |                  |                  |
| LDL cholesterol testing | -2.2             | 1.7 | -1.6             | 1.2 | -2.6             | 1.0              |

ACO = accountable care organization; BETOS = Berenson-Eggers Type of Service; LDL = low-density lipoprotein.

\*Includes claims for physician and ancillary (supplier) services appearing in the carrier file as well as claims for physician and ancillary services appearing in the hospital outpatient department claims file. Analyses of spending by BETOS categories were restricted to the 5% sample of Medicare beneficiaries, for whom we had both hospital outpatient department and carrier claims files. BETOS codes were grouped as follows: office visits (M1A-M1B); specialty consultations (M5A-M5D, M6); major procedures (P0, P4A-P4E, P1A-P3D except P2D); minor and ambulatory procedure and endoscopy (P5A-P5E, P6A-P6D, P8A-P8I); imaging (I1A-I1F, I2A-I2D, I3A-I3F); cardiac catheterization, testing, and imaging (I4A-I4B, P2D, T2A-T2D); radiation therapy, chemotherapy, and other drugs (P7A-P7B, O1D-O1E); lab tests (T1A-T1H).

†Includes spending for anesthesia services.

‡Analyses of quality measures were restricted to the 5% sample of Medicare beneficiaries, for whom we had hospital outpatient department, inpatient facility, and carrier claims to assess receipt of key services. Readmissions were assessed among beneficiaries with at least one acute care hospitalization in 2009. We counted only one readmission per beneficiary annually in calculating 30-day readmission rates. Screening mammography was assessed among women ages 65-69 years. Diabetes services were assessed among beneficiaries with a history of diabetes prior to 2009. LDL testing for cardiovascular disease was assessed among beneficiaries with ischemic heart disease, history of myocardial infarction, or history of stroke or TIA present prior to 2009.

§Denotes lack of statistically significant difference relative to reference category of small groups. All other estimates for ACO-eligible group types differ significantly from small groups at least at the P<0.05 level.

**Appendix Table 4. Evaluation and management (E&M) service codes used to assign Medicare beneficiaries to Shared Savings Program and Pioneer ACOs**

| <b>Current Procedural Terminology Codes for E&amp;M Physician Services</b> | <b>Setting/Description of E&amp;M Physician Services</b> |
|----------------------------------------------------------------------------|----------------------------------------------------------|
| 99201-99215                                                                | Office or other outpatient services                      |
| 99304-99318                                                                | Nursing facility services                                |
| 99324-99340                                                                | Domiciliary, rest home, or custodial care services       |
| 99341-99350                                                                | Home services                                            |
| G0402, G0438, G0439*                                                       | Wellness visits                                          |

\*Codes G0438 and G0439 were not in use in 2009

**Appendix Table 5. Beneficiary assignments by source of provider group identifiers**

| <b>Source of provider group identifiers</b>      | <b>Number of beneficiaries assigned by group size</b>                             |                                                                                                   |                                                                                       |                                                                            |
|--------------------------------------------------|-----------------------------------------------------------------------------------|---------------------------------------------------------------------------------------------------|---------------------------------------------------------------------------------------|----------------------------------------------------------------------------|
|                                                  | <b>Groups not eligible for ACO programs</b><br>( $<5,000$ assigned beneficiaries) | <b>Groups eligible for Shared Savings Program</b><br>( $5,000$ - $14,999$ assigned beneficiaries) | <b>Groups eligible for Pioneer program</b><br>( $\geq 15,000$ assigned beneficiaries) | <b>Total ACO-eligible groups</b><br>( $\geq 5,000$ assigned beneficiaries) |
| TINs from Medicare claims                        | 2,997,541                                                                         | 837,471                                                                                           | 455,984                                                                               | 1,293,455                                                                  |
| AMA Group Practice File                          | 2,386,710                                                                         | 906,852                                                                                           | 997,434                                                                               | 1,904,286                                                                  |
| Both (beneficiary assigned to larger of the two) | 2,302,247                                                                         | 960,904                                                                                           | 1,027,845                                                                             | 1,988,749                                                                  |
